### Appropriate Clinical Use of Lactate Measurements: Erratum

In the article beginning on page 637 in the April 2021 issue, there was a typo in the last paragraph of the Sepsis section. In the sentence “In addition to directly limited renal and hepatic perfusion, the capacity of these organs to undergo gluconeogenesis becomes severely reduced with profound academia” on page 640, the word “academia” should have been changed to “acidemia.”

The author regrets this error. The online version and PDF of the article have been corrected.

DOI: 10.1097/ALN.0000000000003816

### Reference

Pino RM, Singh J: Appropriate clinical use of lactate measurements. *ANESTHESIOLOGY* 2021; 134:637–44
